# Supplementary material
Source: publisher figshare collection journal article supplement (https://gsajournals.figshare.com/ndownloader/files/30848167)
Supplement: Supplementary file 1 [file 30848167]

## Sheet: final_busco_ids
Table S2 List of BUSCO genes including in the MLST.
BUSCO gene IDs
771at4751
1866at4751
3534at4751
4409at4751
4466at4751
4523at4751
6186at4751
6272at4751
6377at4751
6812at4751
7423at4751
8818at4751
12258at4751
12812at4751
12959at4751
14295at4751
14441at4751
14523at4751
14986at4751
17174at4751
20600at4751
20952at4751
21651at4751
21689at4751
22982at4751
23198at4751
23856at4751
24198at4751
25020at4751
25161at4751
26329at4751
29512at4751
32164at4751
34223at4751
34830at4751
37028at4751
37573at4751
38031at4751
38184at4751
49476at4751
50786at4751
50835at4751
52909at4751
53270at4751
54919at4751
56729at4751
59795at4751
64498at4751
65334at4751
66151at4751
67284at4751
67399at4751
71039at4751
73383at4751
75709at4751
76196at4751
78289at4751
79262at4751
79797at4751
81295at4751
81614at4751
86293at4751
87251at4751
87313at4751
90022at4751
93783at4751
94628at4751
96633at4751
97141at4751
98733at4751
98739at4751
101133at4751
103836at4751
104173at4751
105401at4751
107464at4751
109276at4751
111189at4751
112937at4751
115993at4751
117017at4751
118189at4751
119833at4751
122507at4751
122824at4751
123228at4751
125935at4751
126037at4751
126249at4751
126519at4751
129160at4751
129326at4751
135652at4751
137963at4751
138697at4751
142965at4751
143414at4751
148293at4751
150469at4751
160044at4751
160940at4751
160995at4751
167290at4751
167498at4751
168092at4751
169381at4751
170297at4751
170904at4751
171238at4751
172113at4751
172363at4751
173428at4751
173995at4751
174653at4751
175136at4751
175599at4751
176648at4751
179437at4751
179897at4751
181959at4751
183720at4751
183801at4751
183849at4751
184762at4751
186574at4751
187821at4751
188070at4751
190183at4751
192135at4751
192452at4751
195863at4751
196015at4751
197111at4751
197612at4751
198196at4751
202089at4751
203710at4751
204087at4751
205479at4751
207926at4751
209053at4751
212522at4751
212735at4751
216270at4751
216661at4751
216683at4751
216747at4751
216949at4751
217097at4751
217374at4751
219236at4751
224693at4751
224804at4751
225321at4751
225351at4751
225712at4751
226810at4751
228465at4751
229510at4751
231468at4751
232698at4751
234548at4751
235463at4751
236504at4751
237276at4751
240036at4751
241079at4751
241483at4751
241586at4751
241860at4751
244066at4751
247065at4751
247383at4751
252469at4751
254717at4751
256914at4751
257330at4751
258245at4751
259060at4751
259883at4751
260251at4751
260722at4751
260896at4751
261237at4751
262317at4751
265302at4751
266634at4751
269389at4751
269580at4751
276205at4751
278643at4751
279020at4751
281299at4751
281726at4751
281920at4751
282059at4751
282964at4751
283177at4751
284176at4751
284287at4751
284377at4751
285477at4751
285977at4751
289666at4751
292336at4751
295692at4751
297145at4751
297671at4751
298379at4751
299054at4751
299330at4751
299509at4751
299583at4751
300016at4751
300216at4751
304341at4751
304547at4751
310891at4751
311048at4751
315551at4751
316254at4751
316920at4751
317276at4751
317335at4751
321585at4751
321728at4751
323327at4751
330551at4751
330629at4751
330815at4751
331763at4751
332036at4751
332891at4751
334424at4751
335237at4751
335719at4751
336181at4751
338301at4751
338808at4751
339525at4751
342642at4751
343603at4751
343623at4751
344553at4751
345661at4751
348111at4751
349264at4751
350840at4751
351482at4751
351849at4751
353762at4751
353991at4751
354679at4751
354778at4751
354913at4751
355525at4751
355781at4751
356691at4751
360800at4751
361877at4751
362601at4751
364123at4751
365270at4751
366595at4751
367778at4751
368706at4751
369435at4751
370505at4751
370952at4751
371481at4751
372972at4751
377787at4751
378256at4751
378430at4751
379525at4751
383007at4751
384156at4751
384315at4751
385139at4751
385343at4751
385971at4751
386220at4751
386245at4751
388229at4751
389034at4751
390518at4751
391384at4751
398592at4751
398968at4751
399376at4751
399413at4751
399810at4751
402005at4751
402255at4751
403079at4751
404050at4751
405898at4751
406240at4751
407348at4751
408419at4751
410986at4751
411130at4751
411518at4751
411677at4751
411919at4751
417746at4751
418242at4751
419048at4751
419667at4751
419868at4751
421687at4751
422151at4751
422622at4751
428774at4751
428984at4751
431607at4751
433181at4751
434428at4751
435471at4751
435767at4751
436872at4751
443595at4751
444399at4751
445401at4751
446124at4751
449717at4751
451032at4751
452759at4751
453693at4751
453909at4751
454746at4751
455110at4751
456963at4751
457544at4751
457951at4751
464711at4751
464897at4751
465849at4751
468195at4751
477122at4751
481052at4751
483049at4751
483370at4751
483390at4751
485650at4751
490662at4751
494427at4751
497024at4751
